# Supplementary material for: Phase-controllable polymerized ionic liquids for CO2 fixation into cyclic carbonates
Source: Royal Society of Chemistry journal article supplement (doi:10.1039/d0se01293a), 2020-11-23
Supplement: d0se01293a1.pdf [file d0se01293a1.pdf]

## Supporting Information

### Phase-controllable polymerized ionic liquids for CO<sub>2</sub> fixation into cyclic carbonates

Chaokun Yang, Yanglin Chen, Ye Qu, Jiaxu Zhang, Jianmin Sun\*

State Key Laboratory of Urban Water Resource and Environment, MIIT Key Laboratory of Critical Materials Technology for New Energy Conversion and Storage, School of Chemistry and Chemical Engineering, Harbin Institute of Technology, Harbin 150080, P. R. China

Email: [sunjm@hit.edu.cn](mailto:sunjm@hit.edu.cn)

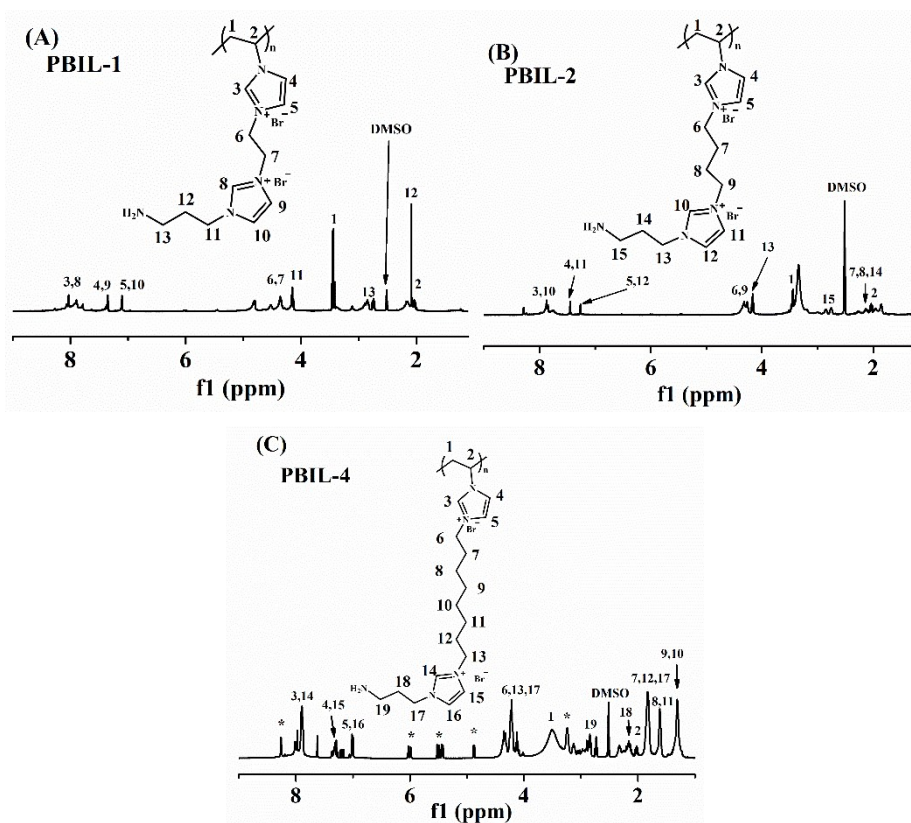

Fig. S1 <sup>1</sup>H NMR spectra of (A) PBIL-1, (B) PBIL-2 and (C) PBIL-4

\* Impure peaks

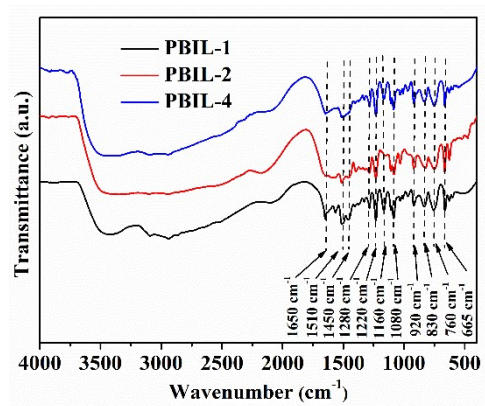

Fig. S2 FT-IR spectra of PBIL-1, PBIL-2 and PBIL-4

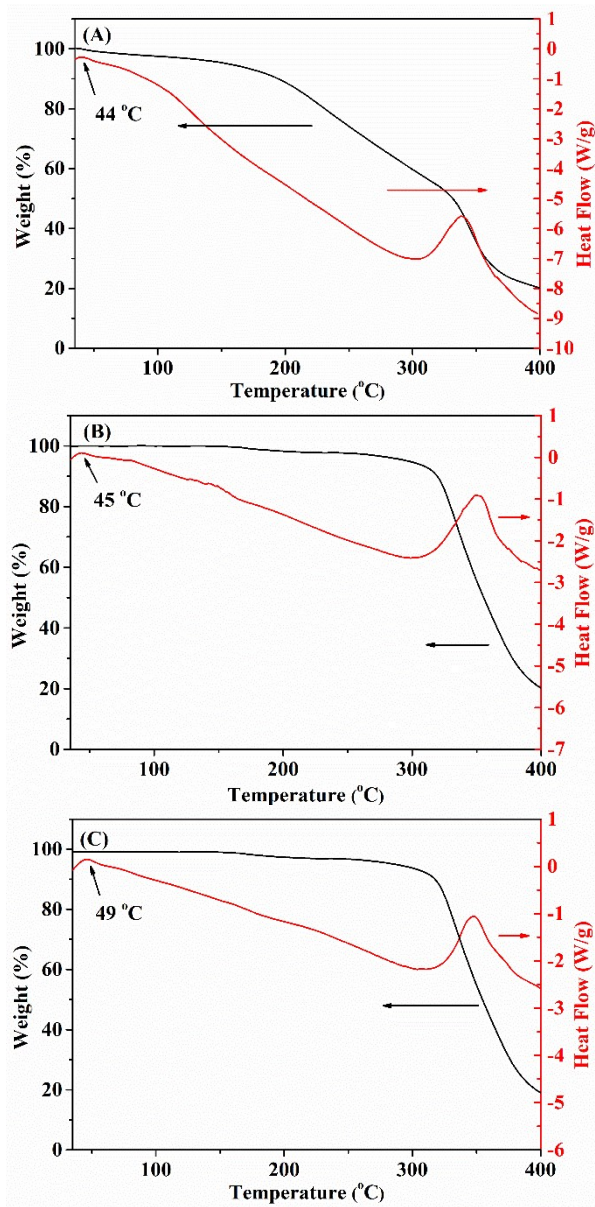

Fig. S3 TG-DSC curves of (A) PBIL-1, (B) PBIL-2 and (C) PBIL-4

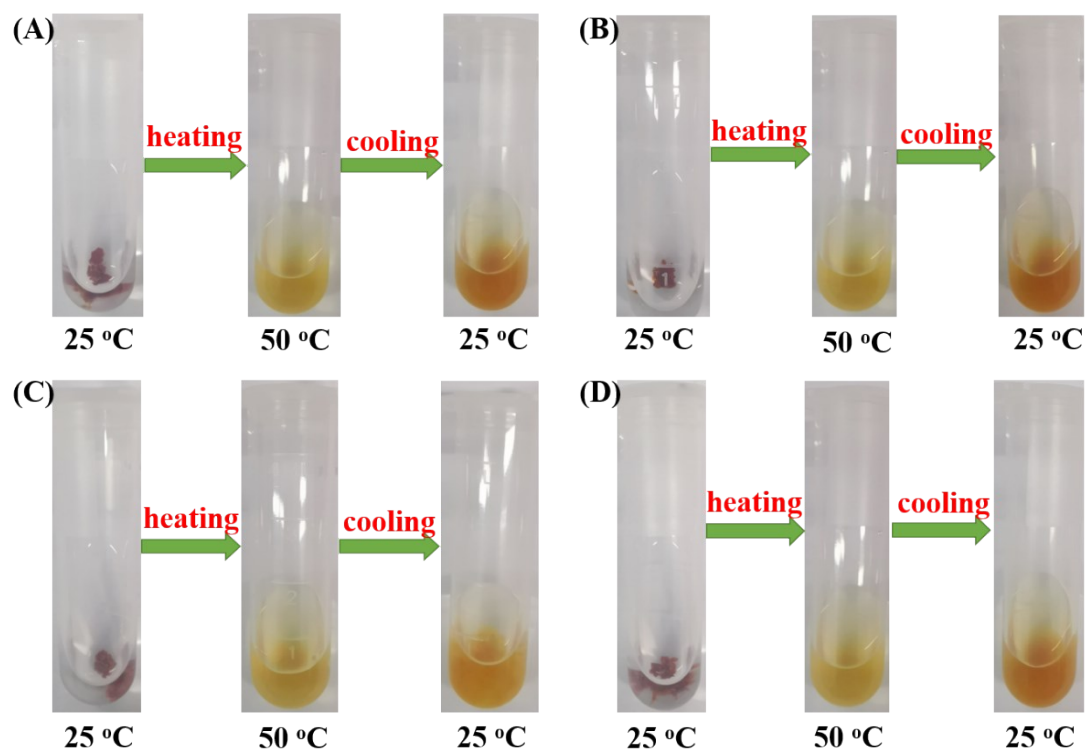

Fig. S4 Phase transition schematic of PBIL-3 in (A) 1,2-epoxybutane, (B) epichlorohydrin, (C) styrene oxide and (D) cyclohexene oxide

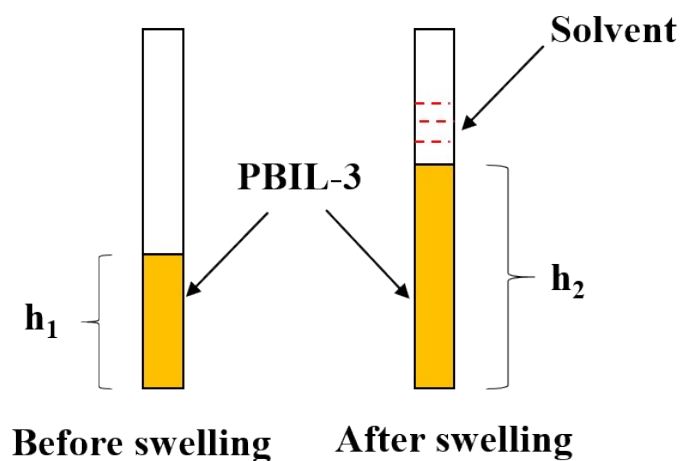

Fig. S5 Schematic of swelling ratio measurement

$$\text{Swelling ratio} = (h_2 - h_1) / h_1 * 100\% \text{ [1,2]}$$

Table S1 Swelling ratio of PBIL-3 in difference substrates (%)<sup>a</sup>

| T (°C) | PO <sup>b</sup> | BO <sup>c</sup> | ECH <sup>d</sup> | SO <sup>e</sup> | CO <sup>f</sup> | H <sub>2</sub> O |
|--------|-----------------|-----------------|------------------|-----------------|-----------------|------------------|
| 25     | < 5             | < 5             | < 5              | 0               | 0               | 170 ± 20         |
| 40     | 25 ± 5          | 25 ± 5          | 25 ± 5           | 10 ± 5          | 10 ± 5          | 220 ± 20         |
| 50     | PT <sup>g</sup> | PT              | PT               | PT              | PT              | PT               |

<sup>a</sup> PBIL-3 100 mg, swelling time was 30 min.

<sup>b</sup> PO = propylene oxide

<sup>c</sup> BO = 1,2-epoxybutane

<sup>d</sup> ECH = epichlorohydrin

<sup>e</sup> SO = styrene oxide

<sup>f</sup> CO = cyclohexene oxide

<sup>g</sup> PT = phase transition

## References

1. S. P. Wang, F. G. He, Q. Weng, Y. Diao, P. Chen, X. B. Chen and Z. W. An, RSC Adv., 2020, **10**, 24772-24783.
2. K. Yang, J. M. Xu, T. N. Shui, Z. G. Zhang, H. Wang, Q. Liu, W. B. Chen, H. C. Shen, H. Y. Zhang, Z. Wang and H. Z. Ni, React. Funct. Polym., 2020, **151**, 104551.
